# Supplementary figures and images for: Effects of Ecological Programs and Other Factors on Soil Wind Erosion between 1981–2020
Source: MDPI journal article supplement (doi:10.3390/rs14215322), 2022-10-24

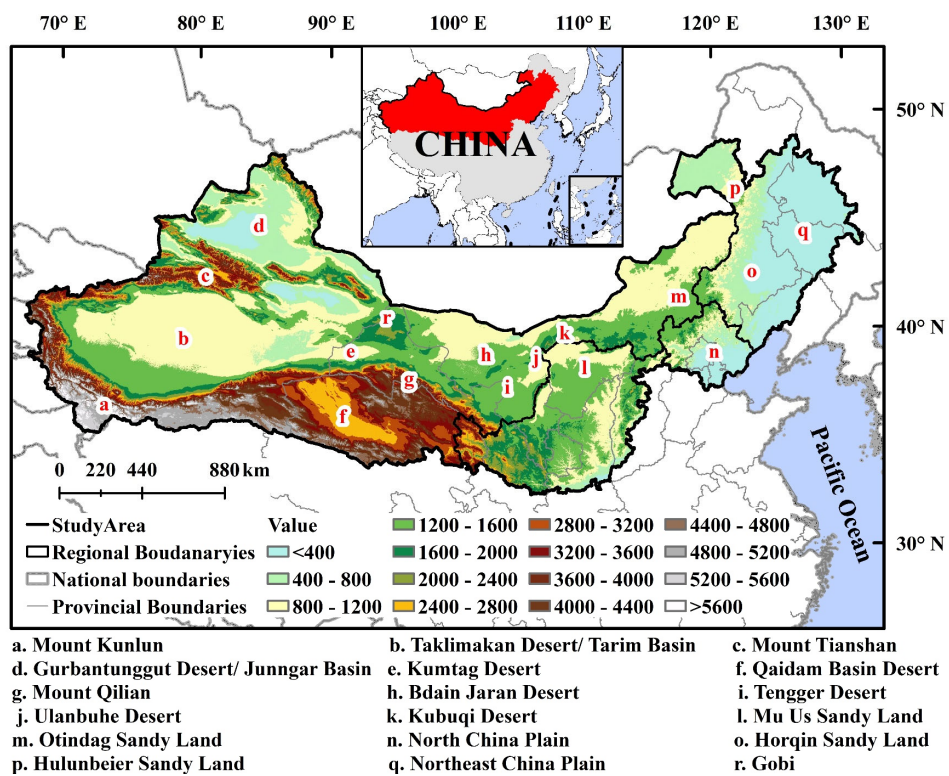

**Figure S1.** Location of main deserts, sandy lands, mountains, basins and plains in TNR of China.

Supplement: s1 [file s1]
